# Supplementary material for: Ask the Locals: A Community-Informed Analysis of Perceived Marine Environment Quality Over Time in Palawan, Philippines
Source: PubMed Central journal article supplement (PMC8382879; doi:10.3389/fpsyg.2021.661810), 2021-08-10

# Supplementary Material

## Ask the Locals:

### A Community-Informed Analysis of Perceived Marine Environment Quality over Time in Palawan, Philippines

**Joel D.C. Sumeldan<sup>1\*</sup>, Isabel Richter<sup>2</sup>, Arlene L. Avillanosa<sup>1</sup>, Hernando P. Bacosa<sup>1,3</sup>, Lota A. Creencia<sup>1</sup>, Sabine Pahl<sup>2,4</sup>**

<sup>1</sup>College of Fisheries and Aquatic Sciences, Western Philippines University, Puerto Princesa City, Palawan, Philippines

<sup>2</sup>School of Psychology, University of Plymouth, Drake Circus, Plymouth, Devon, United Kingdom

<sup>3</sup>Department of Biological Sciences, Mindanao State University-Iligan Institute of Technology, Iligan, Philippines

<sup>4</sup>Urban and Environmental Psychology Group, Institute for the Psychology of Cognition, Emotion and Methods, Faculty of Psychology, University of Vienna, Austria

**Figure S1.** Hand drawn maps from Focus Group Discussion in Puerto Princesa City

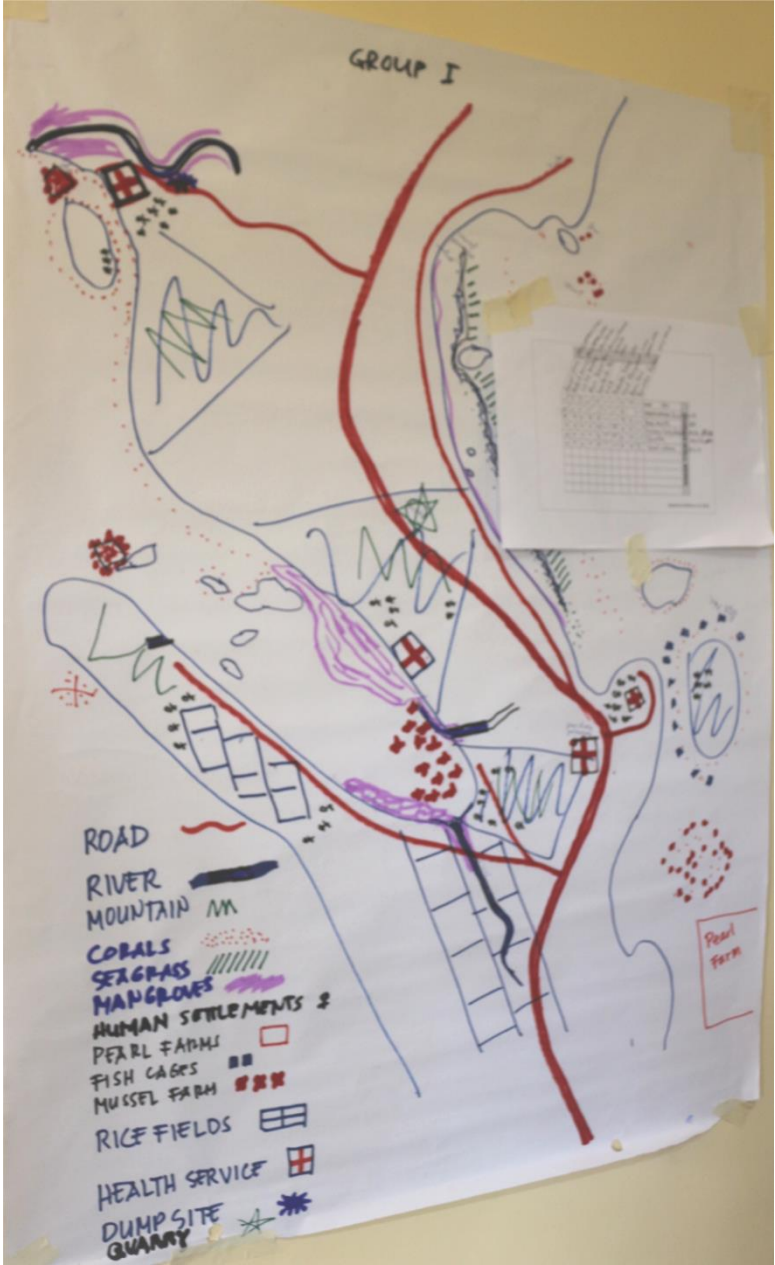

**Figure S2.** Present perceptions across different education. Issues with \*\* are where high significant differences were observed ( $p < 0.01$ ). Issues with \* are where significant differences were observed ( $p < 0.05$ )

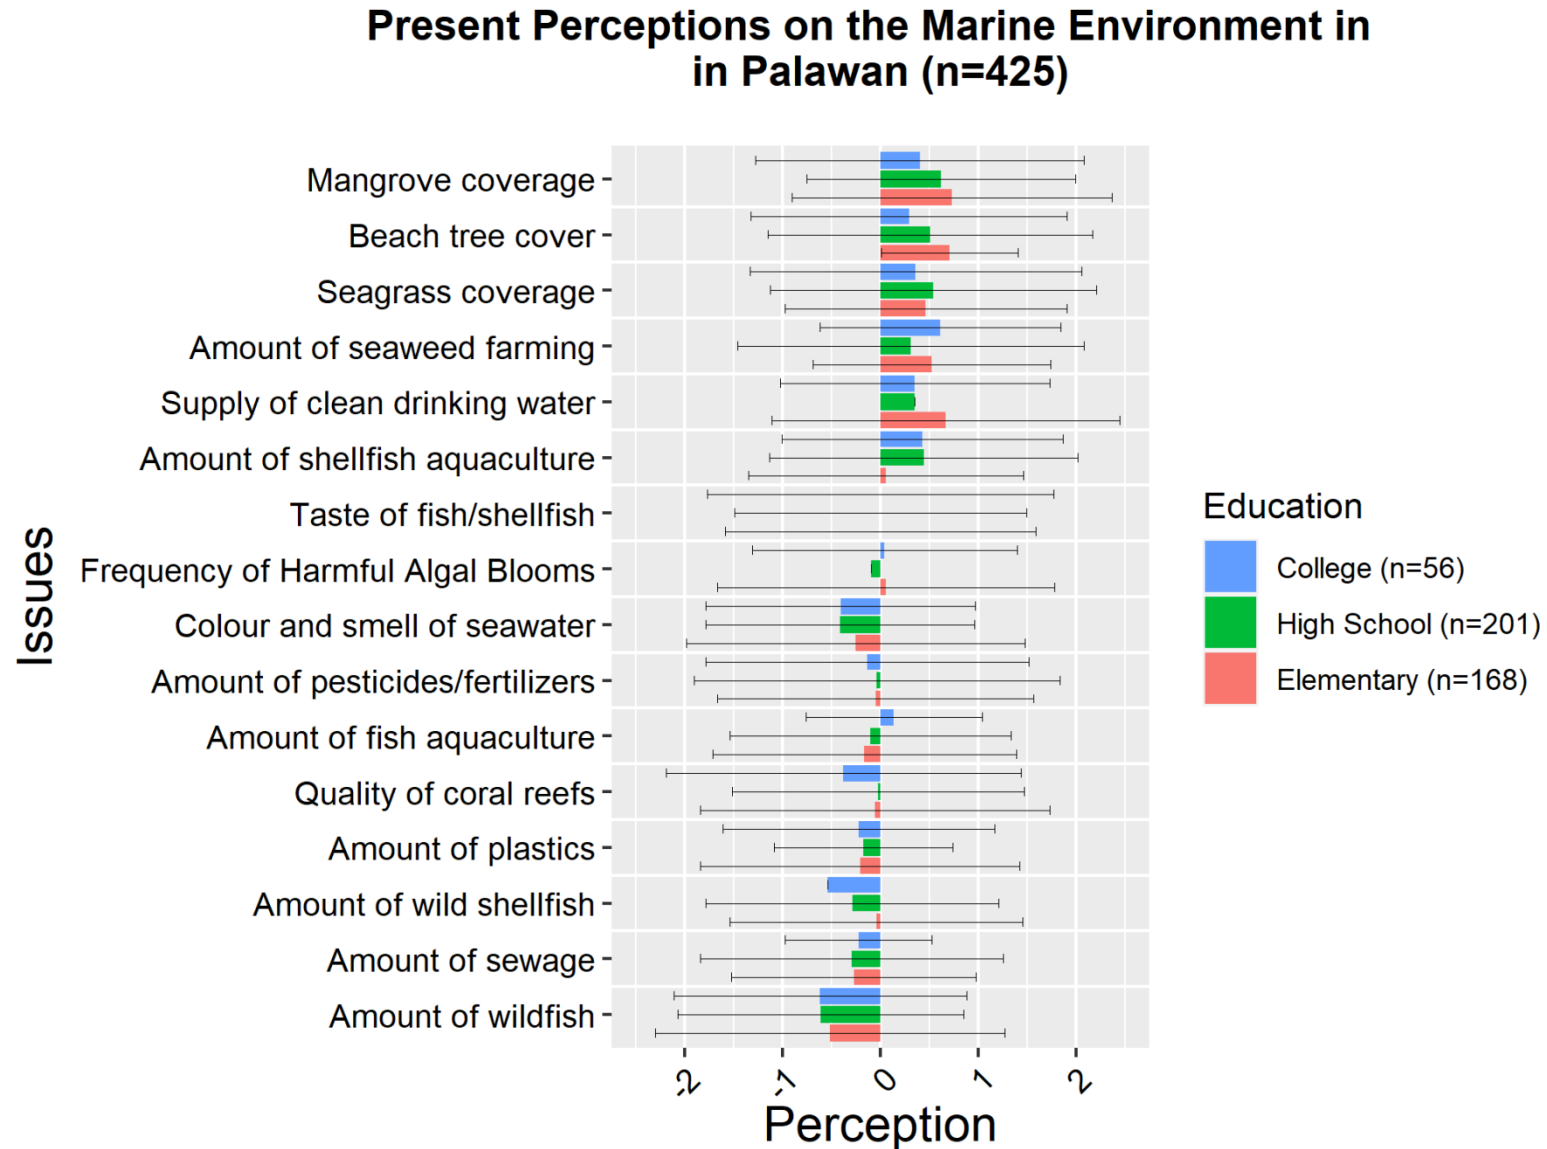

**Figure S3.** Present perceptions across different Income. Issues with \*\* are where high significant differences were observed ( $p < 0.01$ ). Issues with \* are where significant differences were observed ( $p < 0.05$ )

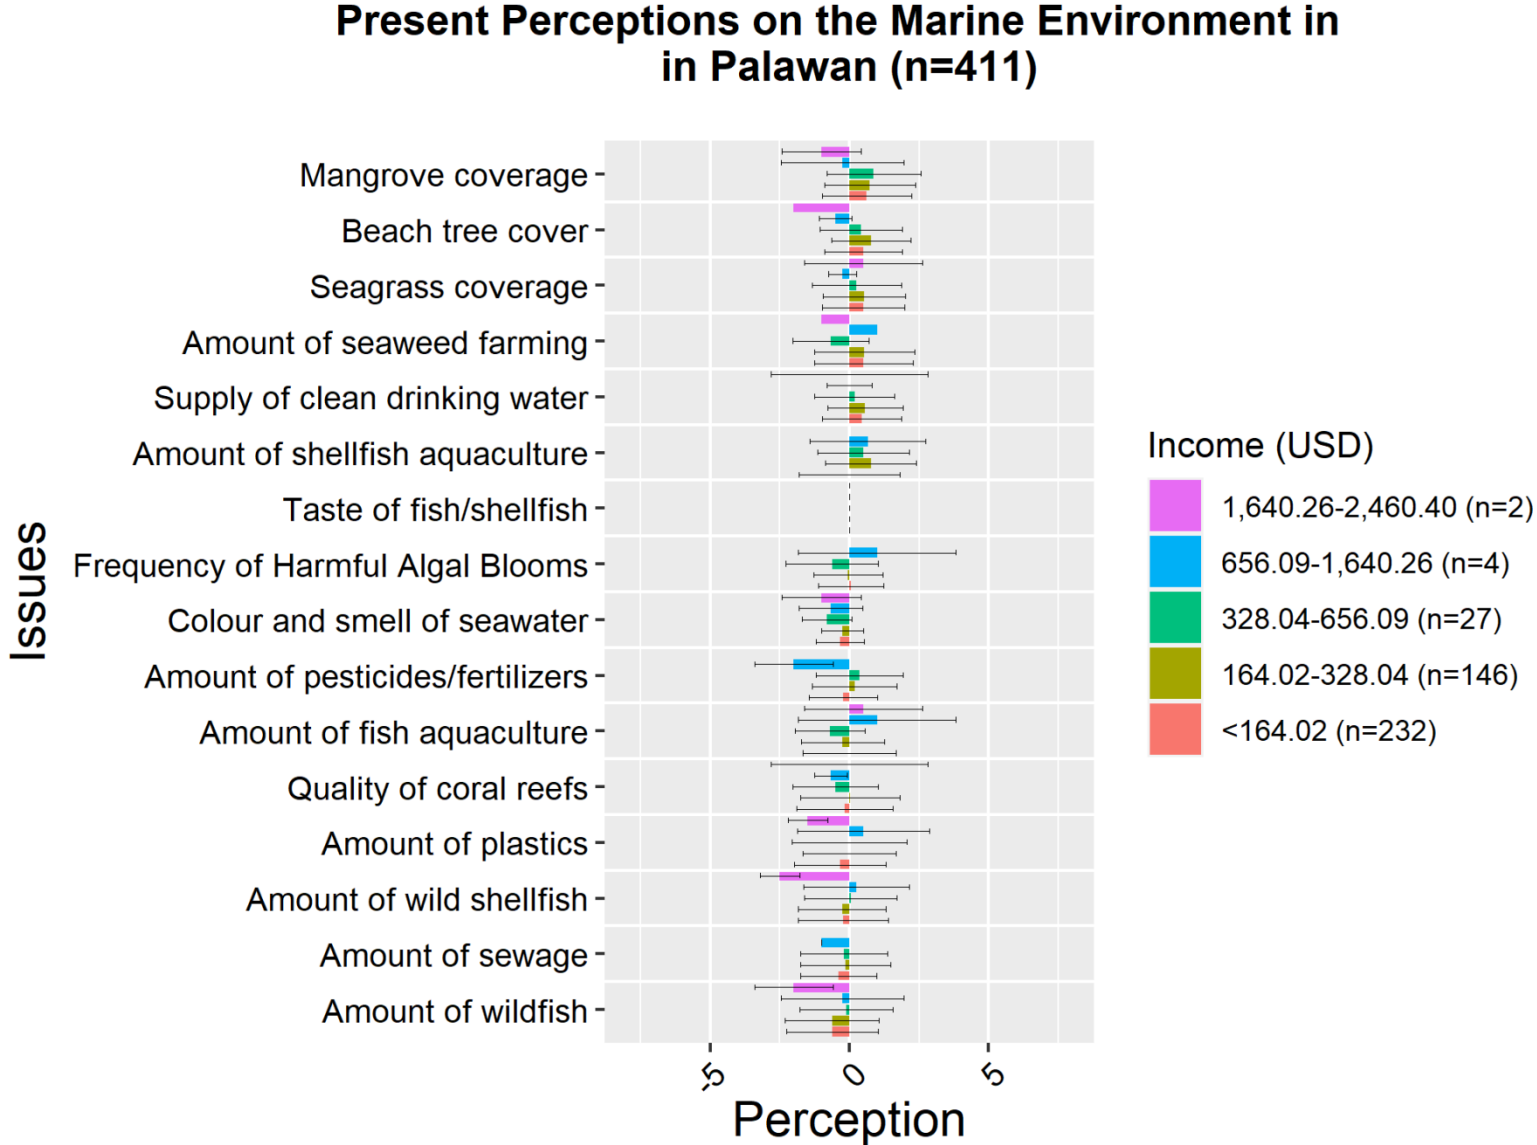

**Figure S4.** Present perceptions across different ages. Issues with \*\* are where high significant differences were observed ( $p < 0.01$ ). Issues with \* are where significant differences were observed ( $p < 0.05$ )

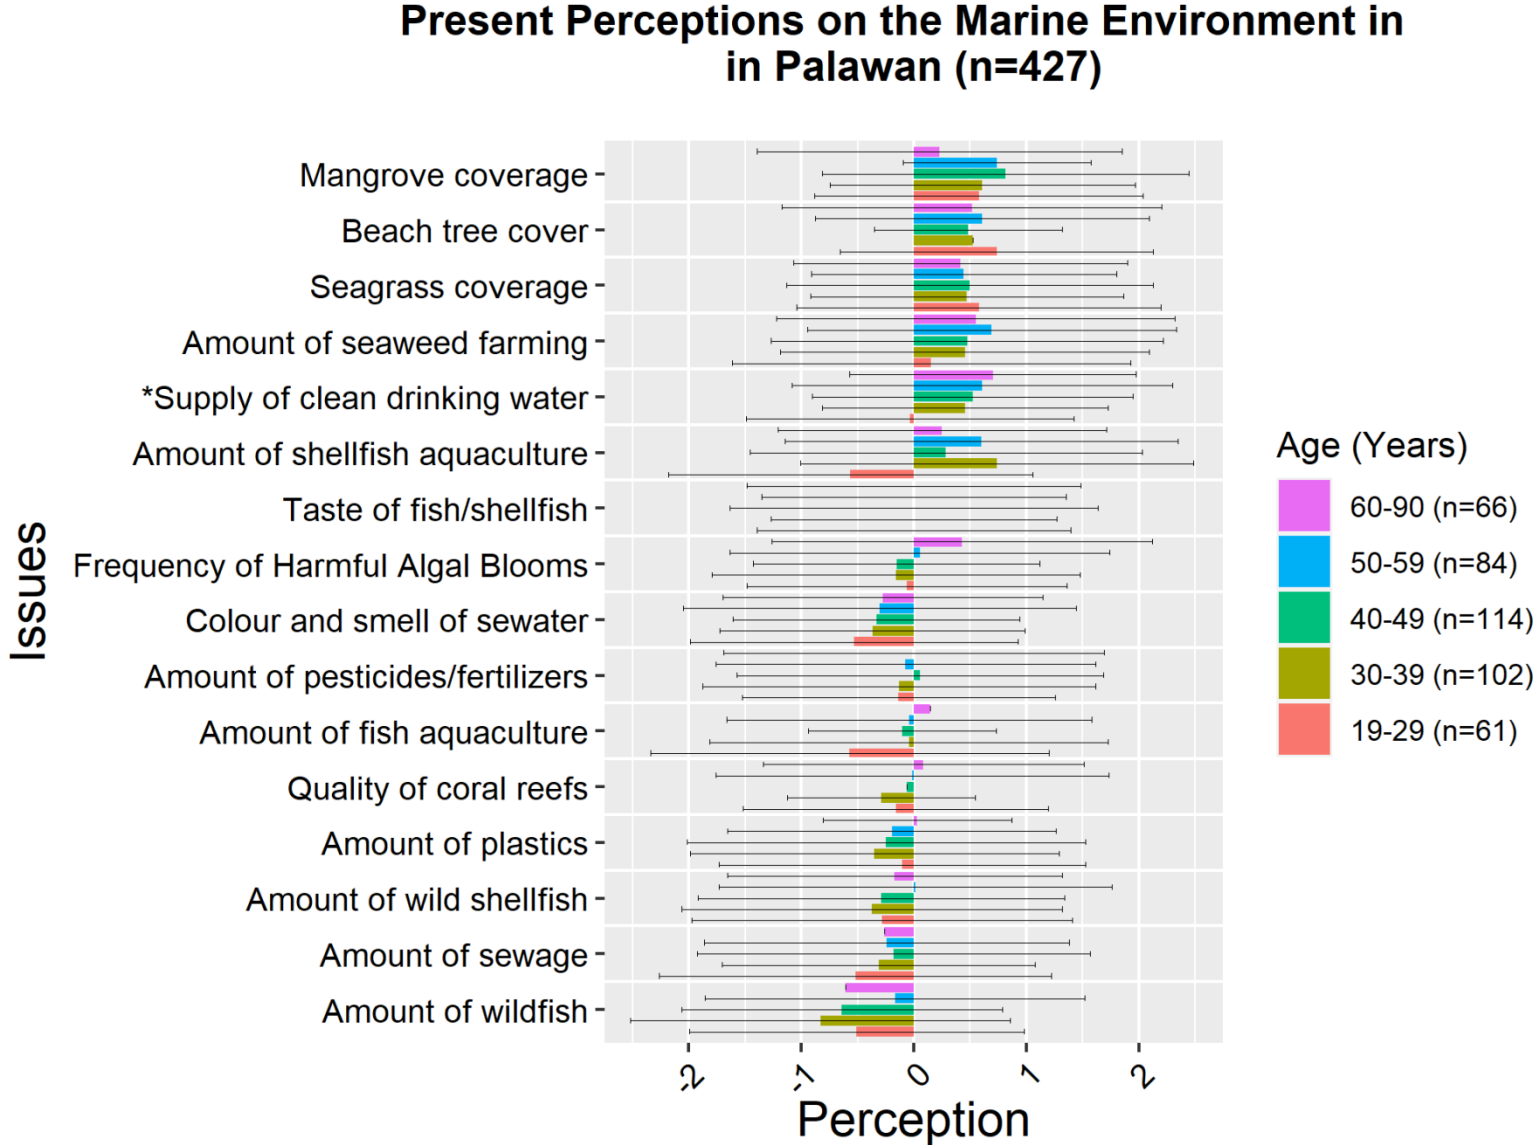

**Figure S5.** Present perceptions between different gender. Issues with \*\* are where high significant differences were observed ( $p < 0.01$ ). Issues with \* are where significant differences were observed ( $p < 0.05$ )

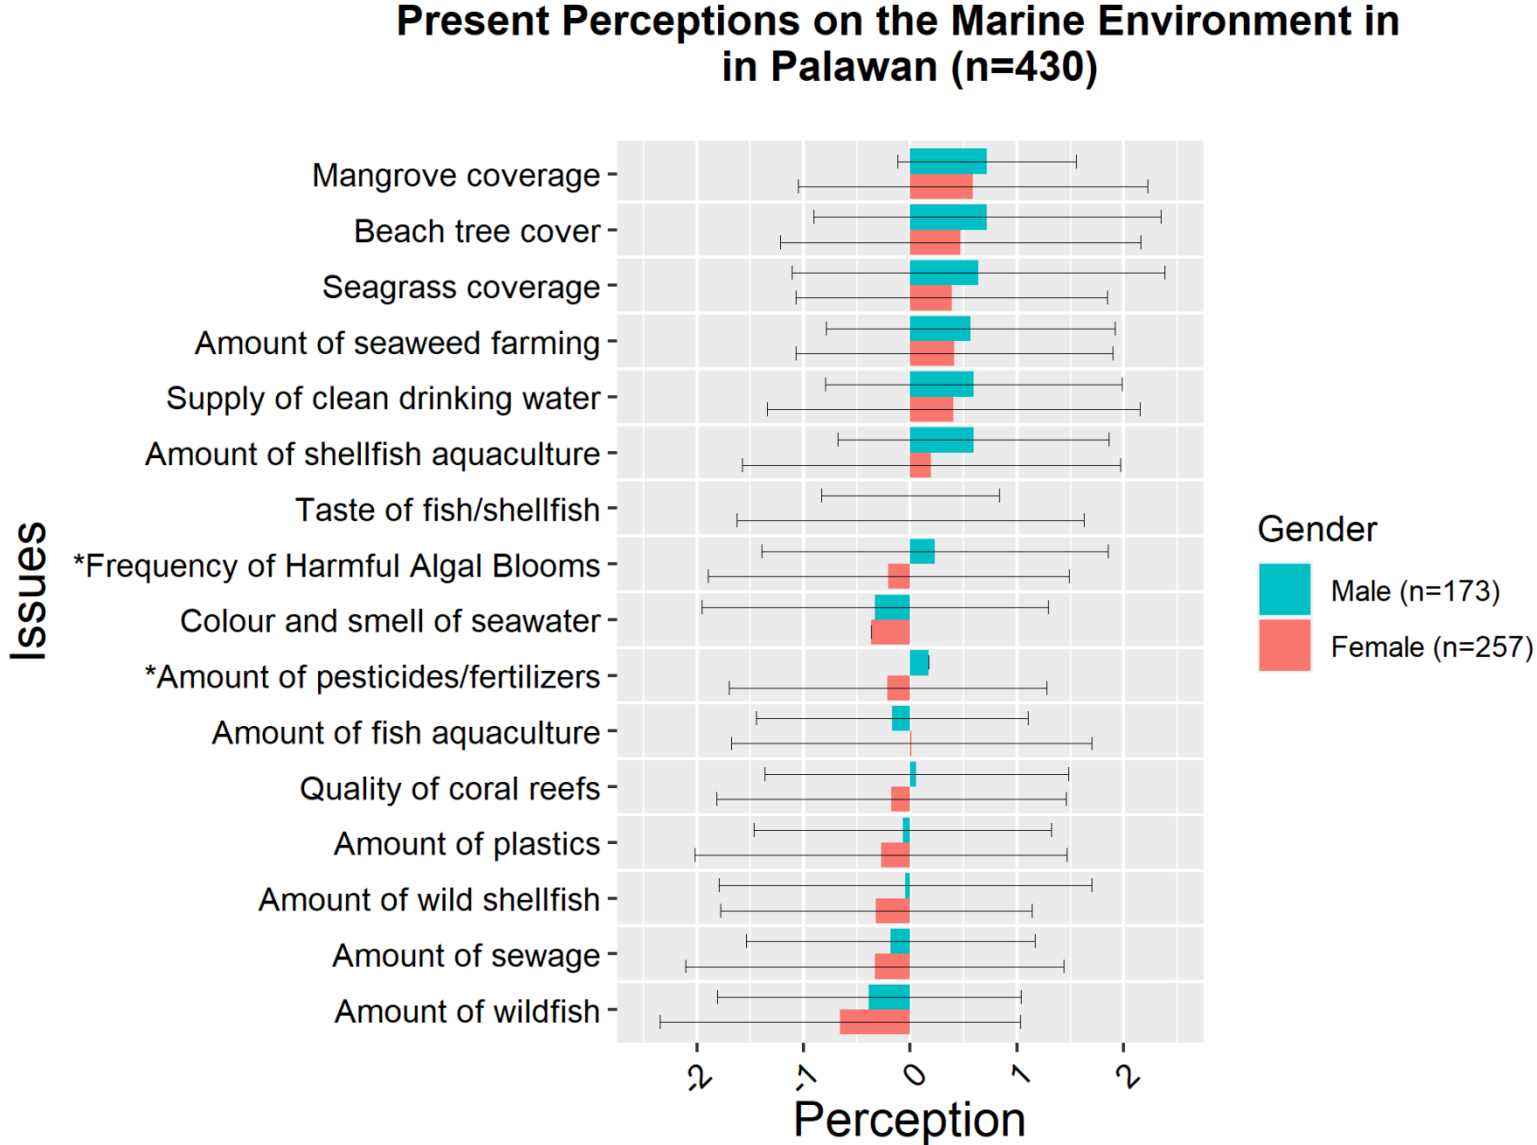

**Figure S6.** Future expectations between different gender. Issues with \*\* are where high significant differences were observed ( $p < 0.01$ ). Issues with \* are where significant differences were observed ( $p < 0.05$ )

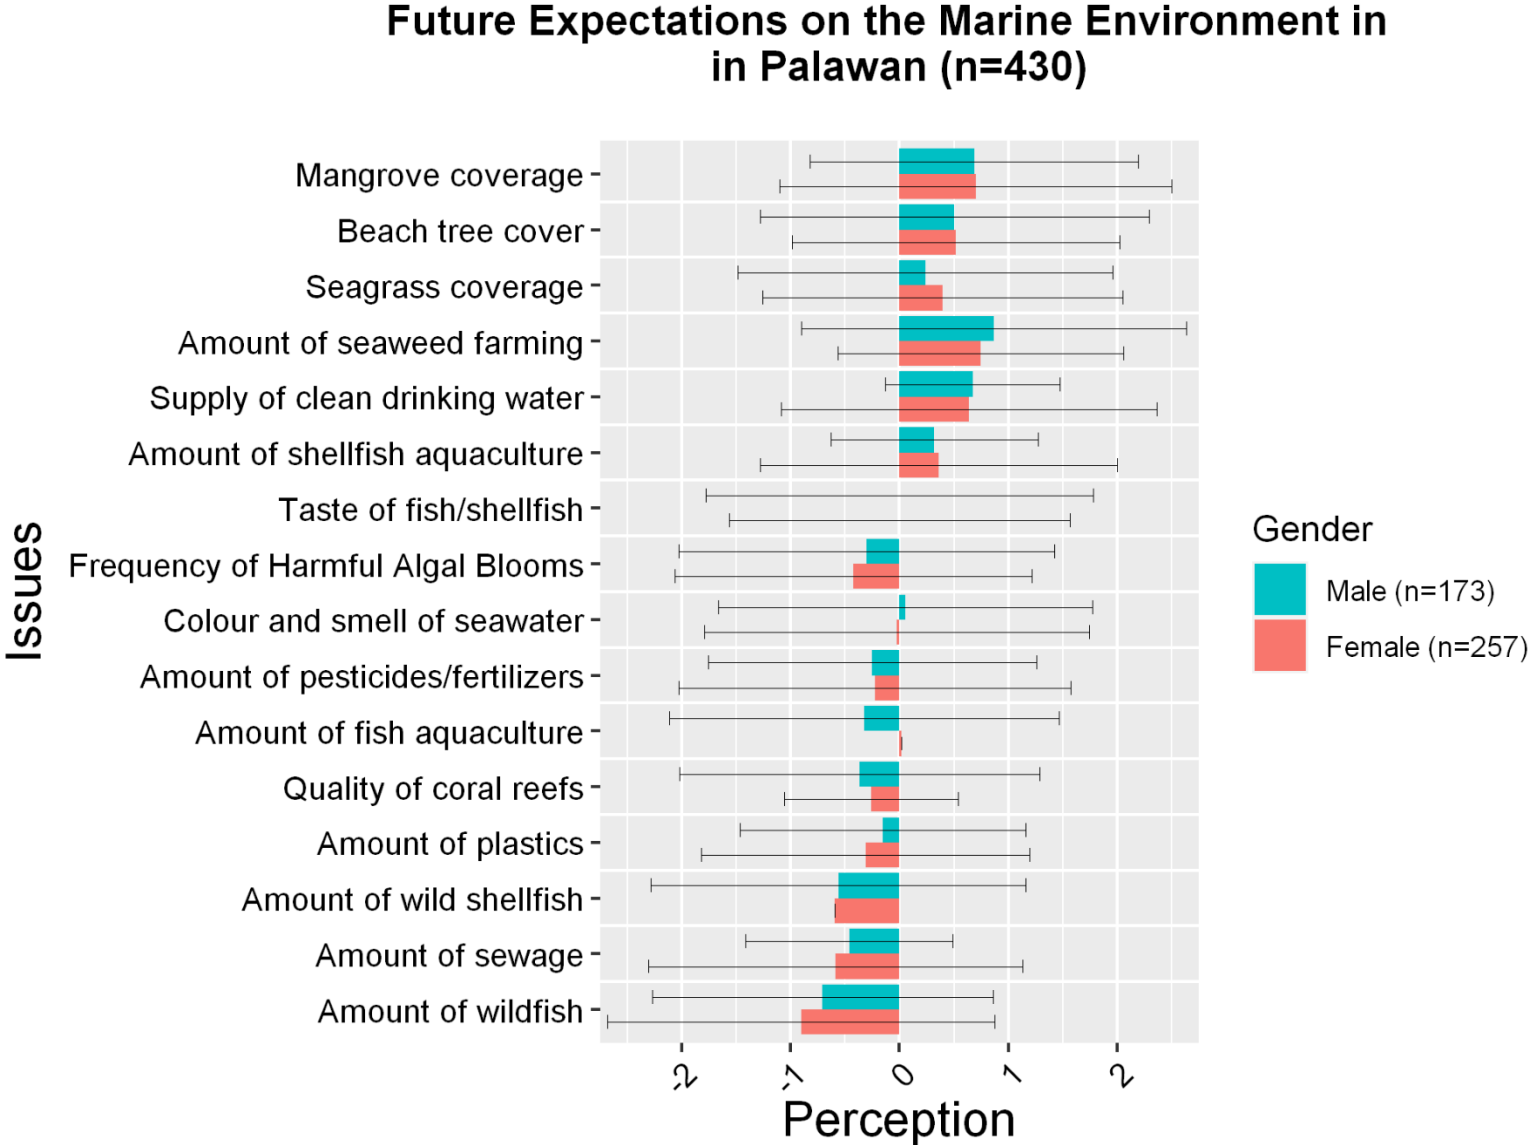

**Figure S7.** Future expectations across different Income. Issues with \*\* are where high significant differences were observed ( $p < 0.01$ ). Issues with \* are where significant differences were observed ( $p < 0.05$ )

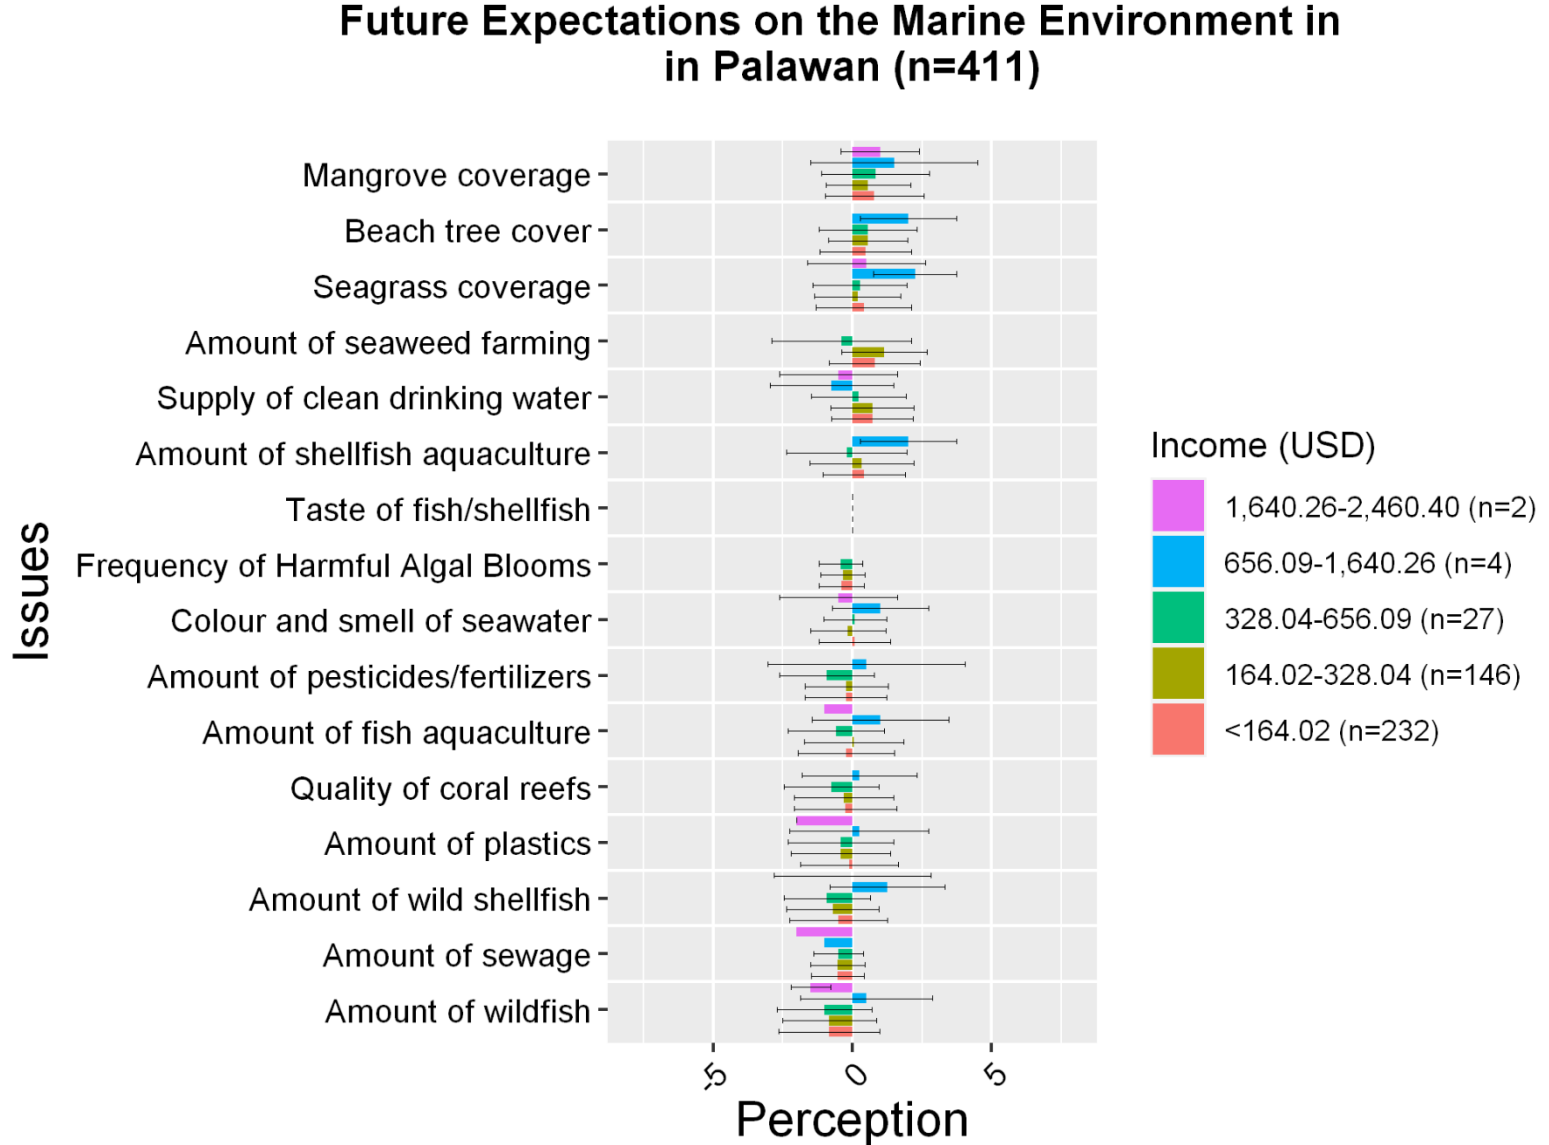



**Figure S8.** Future expectations across different age. Issues with \*\* are where high significant differences were observed ( $p < 0.01$ ). Issues with \* are where significant differences were observed ( $p < 0.05$ )

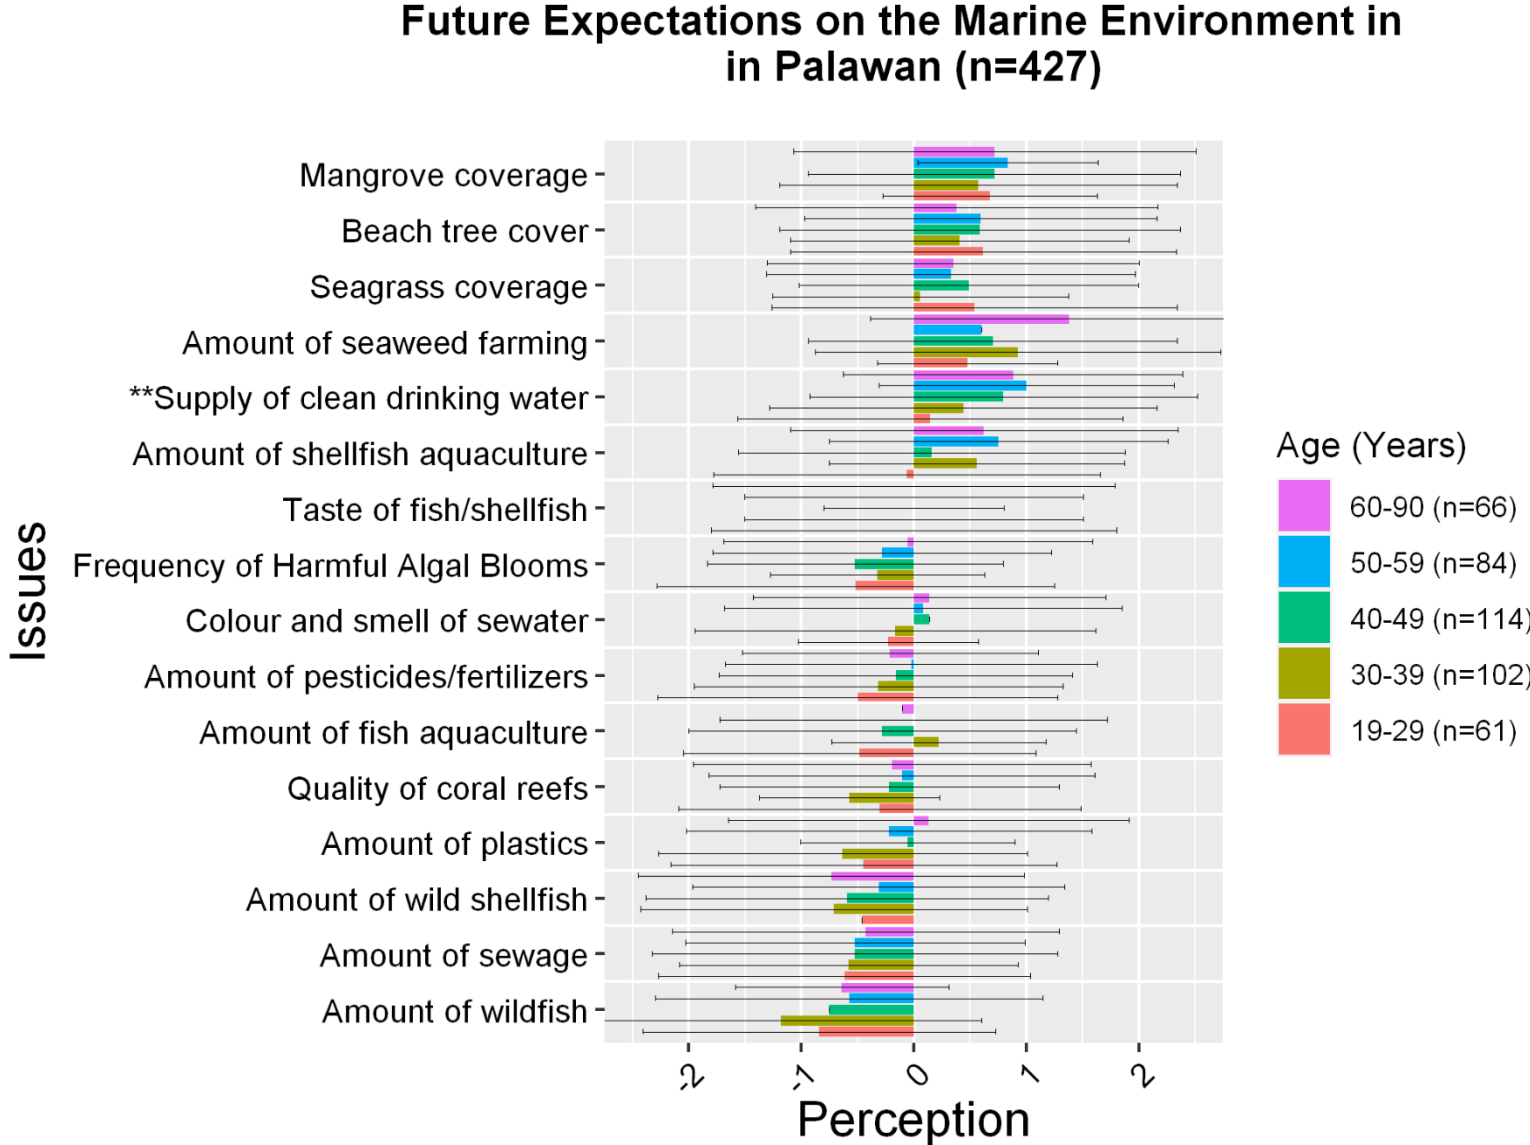

**Figure S9.** Future expectations across different education. Issues with \*\* are where high significant differences were observed ( $p < 0.01$ ). Issues with \* are where significant differences were observed ( $p < 0.05$ )

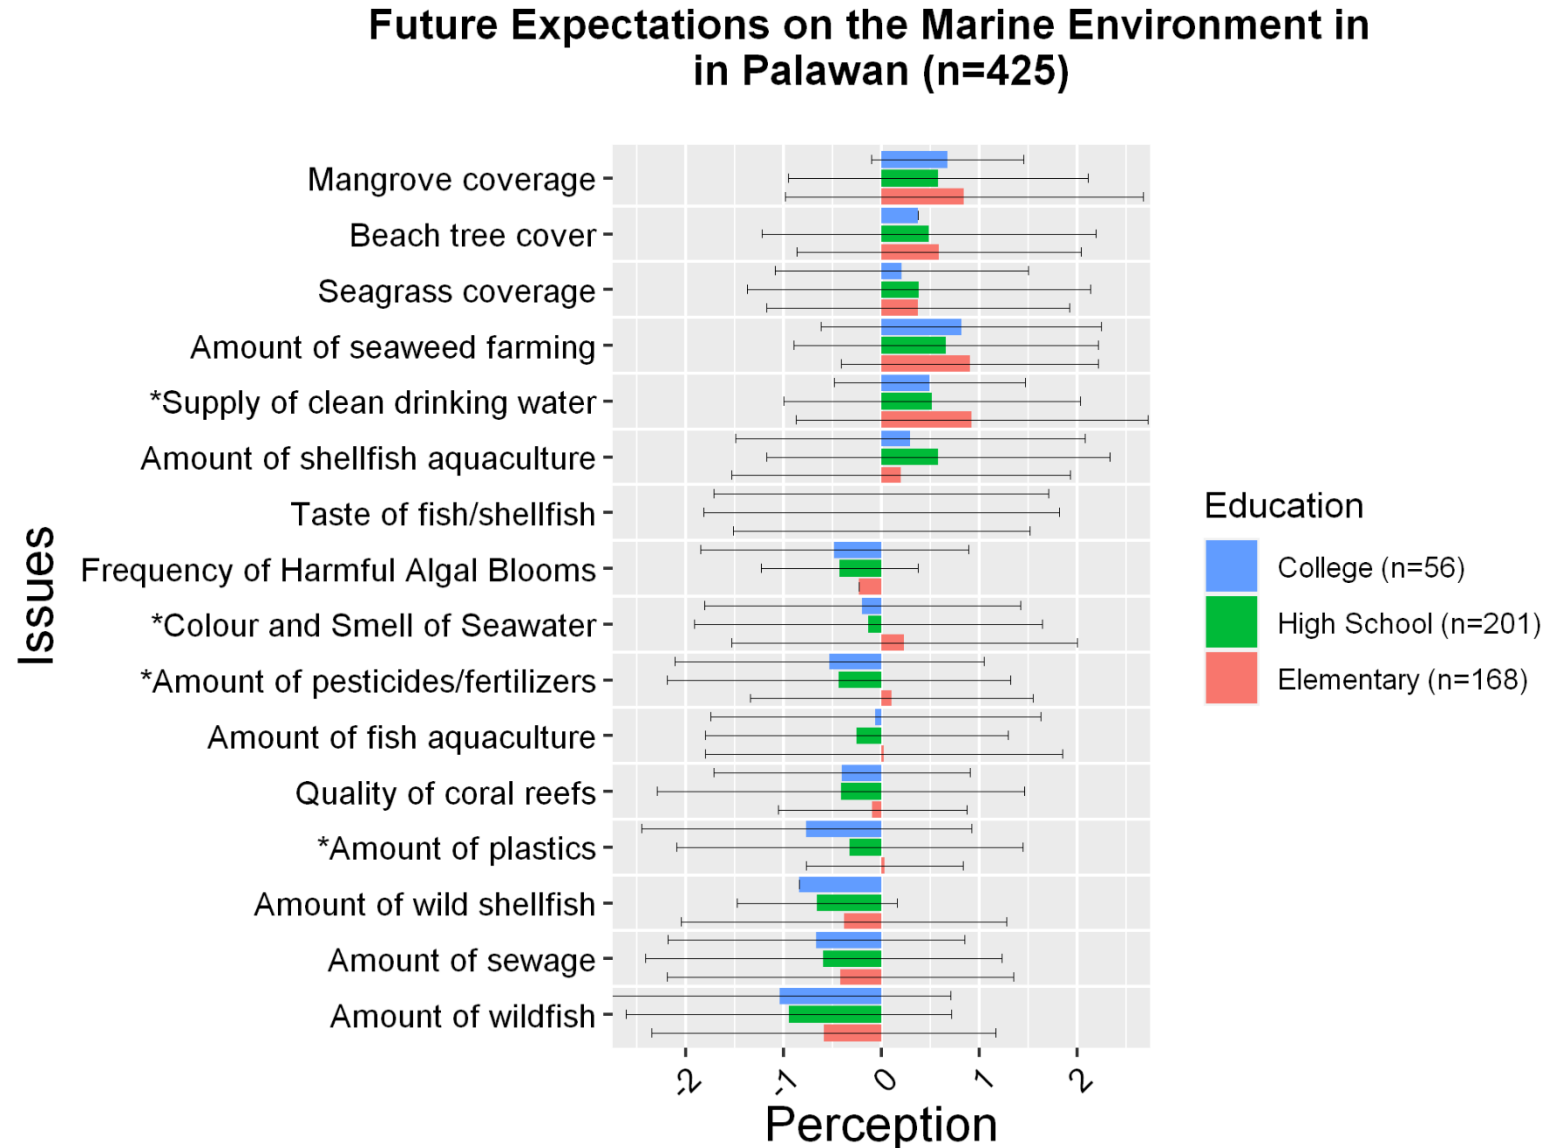

**Figure S10.** Correlation of present perception and future expectation

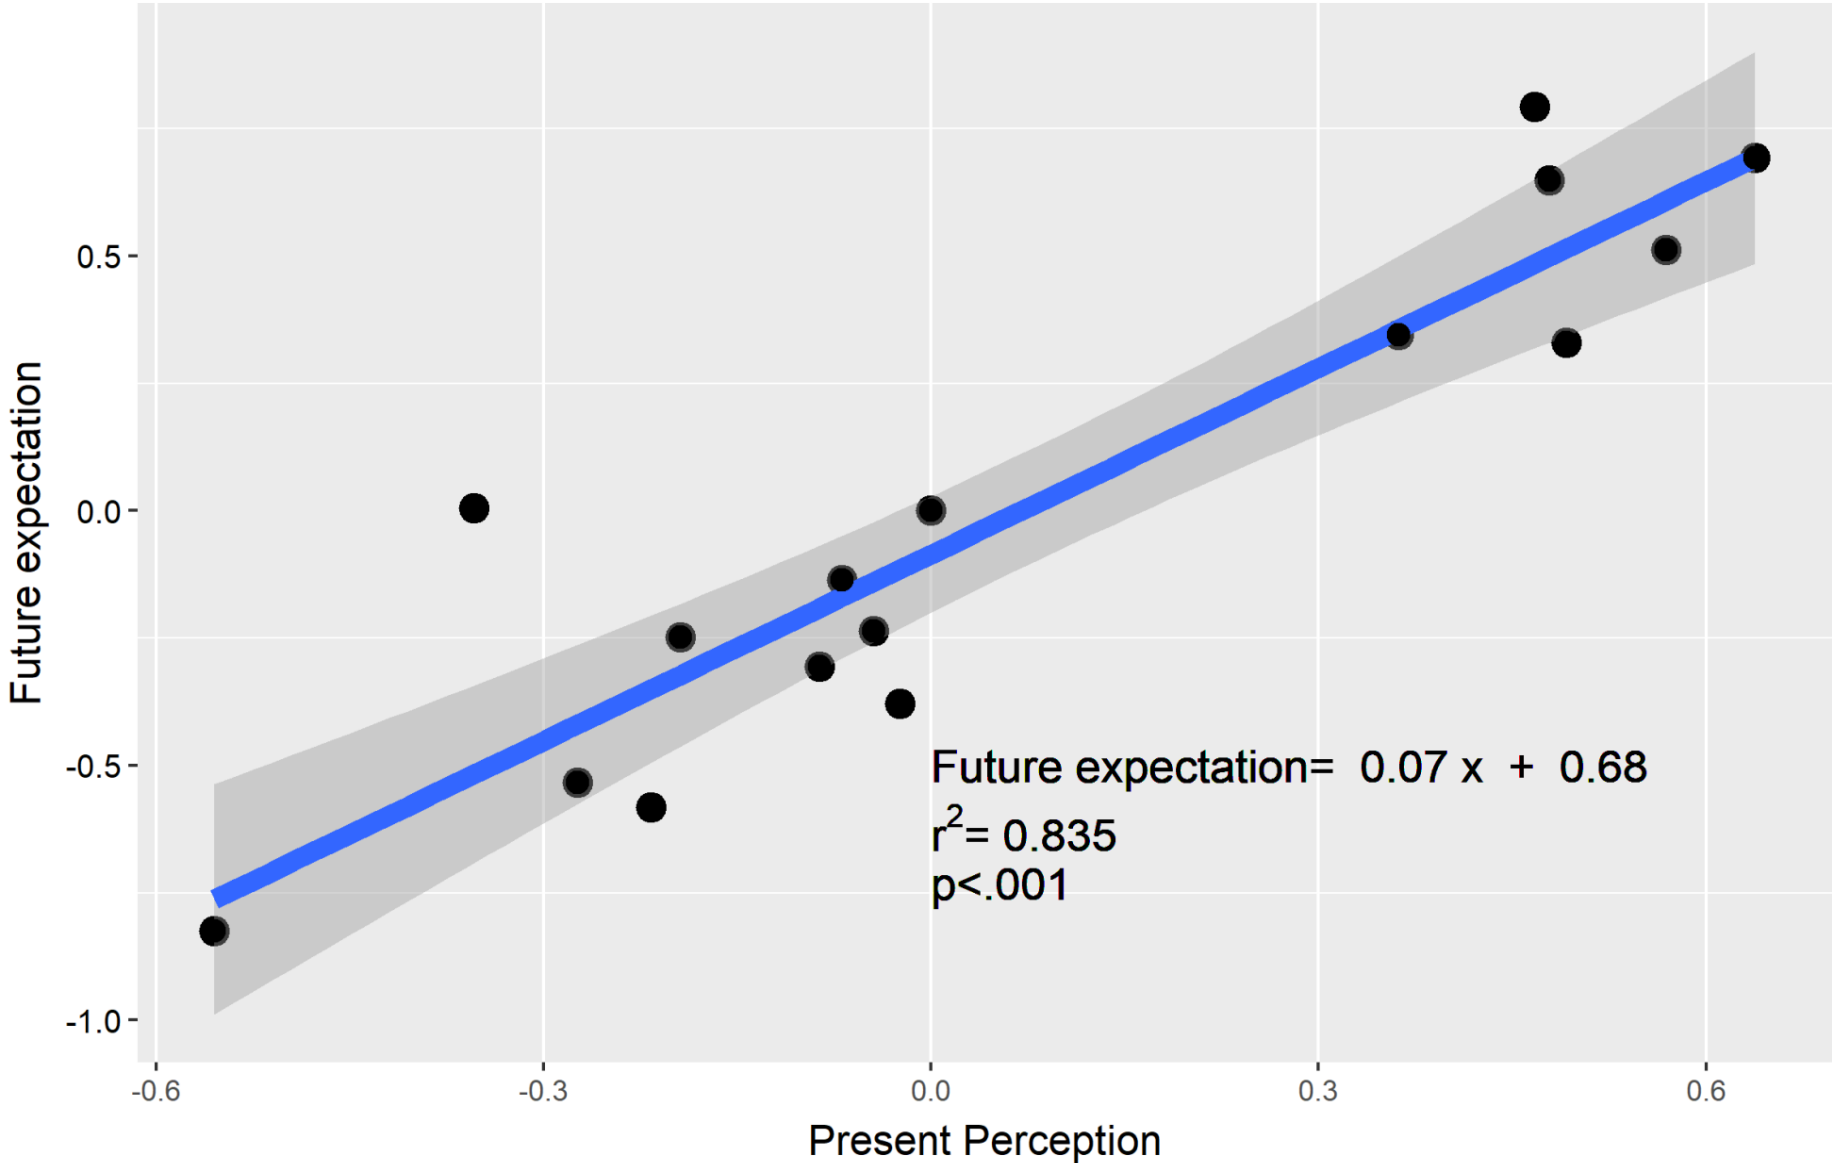

Supplement: Data_Sheet_1.pdf [file Data_Sheet_1.pdf]
